# Supplementary material for: In silico approach to reveal viral populations in grapevine cultivar Tannat using transcriptome data
Source: PubMed Central journal article supplement (PMC4623741; doi:10.1038/srep15841), 2015-10-28
Supplement: srep15841-s1.pdf [file srep15841-s1.pdf]

Supplementary Information for  
***In silico* approach to reveal viral populations in grapevine cultivar Tannat using transcriptome data**

Yeonhwa Jo<sup>1</sup>, Hoseong Choi<sup>1</sup>, Jin Kyong Cho<sup>2</sup>, Ju-Yeon Yoon<sup>3</sup>, Seung-Kook Choi<sup>3</sup>, and Won Kyong Cho<sup>1\*</sup>

<sup>1</sup>Department of Agricultural Biotechnology, College of Agriculture and Life Sciences, Seoul National University, Seoul, 151-921, Republic of Korea

<sup>2</sup>Department of Fruit Tree, Korea National College of Agriculture and Fisheries, Jeonju, 560-500, Republic of Korea

<sup>3</sup>Virology Unit, Department of Horticultural Environment, National Institute of Horticultural and Herbal Science, RDA, Wan-Ju, 565-852, Republic of Korea

\* Corresponding author

Dr. Won Kyong Cho

Department of Agricultural Biotechnology, College of Agriculture and Life Sciences, Seoul National University, Seoul, 151-921, Republic of Korea

Tel: +82-2-880-4687; Fax: +82-2-873-2317

E-mail: [wonkyong@gmail.com](mailto:wonkyong@gmail.com)

## **Supplementary Tables**

### **Supplementary Table 1.**

Summary of 11 grapevine libraries used for the identification of viruses and viroids.

### **Supplementary Table 2.**

Summary of identified viruses and viroids from *de novo*-assembled contigs using individual libraries.

### **Supplementary Table 3.**

Summary of identified viruses and viroids from *de novo*-assembled contigs using all 11 libraries.

### **Supplementary Table 4.**

Summary of identified virus-associated contigs, which were *de novo*-assembled using all 11 libraries.
